# Supplementary material for: Wx: a neural network-based feature selection algorithm for transcriptomic data
Source: Springer Nature journal article supplement (doi:10.1038/s41598-019-47016-8), 2019-07-19
Supplement: MOESM1 [file 41598_2019_47016_MOESM1_ESM.pdf]

# **Wx: a neural network-based feature selection algorithm for transcriptomic data**

Sungsoo Park<sup>1,†</sup>, Bonggun Shin<sup>1,3,†</sup>, Won Sang Shim<sup>1</sup>, Yoonjung Choi<sup>1</sup>, Kilsoo Kang<sup>1</sup>, and  
Keunsoo Kang<sup>2,\*</sup>

<sup>1</sup>Deargen Inc., Daejeon, Republic of Korea; <sup>2</sup>Department of Microbiology, College of Natural  
Sciences, Dankook University, Cheonan 31116, Republic of Korea; <sup>3</sup>Computer Science,  
Emory University, Atlanta, GA 30322

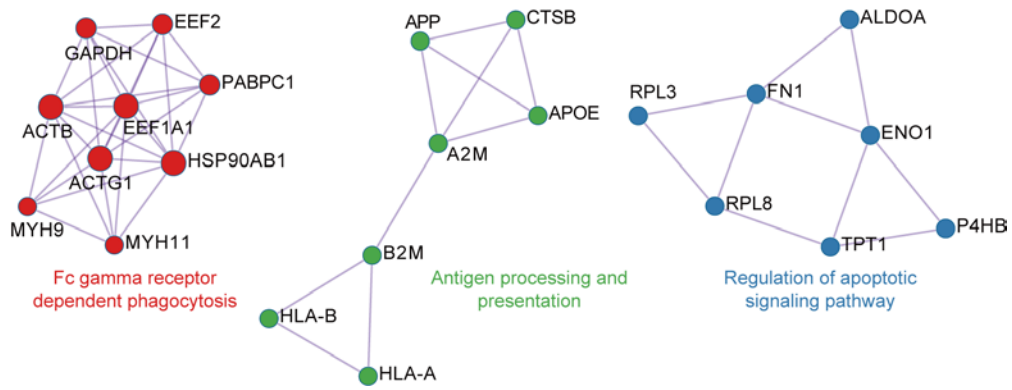

**Supplementary Figure 1.** Key networks of the top 50 genes with highest *DI* scores are shown.
