# Supplementary material for: Wx: a neural network-based feature selection algorithm for transcriptomic data
Source: Sci Rep. 2019 Jul 19;9:10500. doi: 10.1038/s41598-019-47016-8 (PMC6642261; doi:10.1038/s41598-019-47016-8)
Supplement: Supplementary file 2 — Table S1 [file 41598_2019_47016_MOESM2_ESM.xlsx]

## Sheet: Table S1
Supplementary Table 1. Genes ranked by the discriminative index score
Rank	Gene	Discriminative Index (arbitrary number, higher is better)
1	EEF1A1	1.65849
2	FN1	1.61224
3	GAPDH	1.5026
4	SFTPC	0.960806
5	AHNAK	0.712244
6	KLK3	0.563057
7	UMOD	0.555804
8	CTSB	0.428223
9	COL1A1	0.413491
10	GPX3	0.37308
11	GNAS	0.364758
12	ATP1A1	0.346305
13	SFTPB	0.337248
14	ACTB	0.329973
15	ACPP	0.328049
16	FTL	0.319928
17	P4HB	0.310762
18	A2M	0.308666
19	PIGR	0.295266
20	DCN	0.294097
21	EEF2	0.288637
22	CLU	0.284772
23	ACTG1	0.258721
24	PABPC1	0.248663
25	SPARC	0.24861
26	CTSD	0.243279
27	RPL3	0.231052
28	RPL8	0.224584
29	ALDOA	0.216304
30	B2M	0.213906
31	MYH11	0.213647
32	TPT1	0.209914
33	HLA-B	0.208586
34	TXNIP	0.207251
35	HSP90AB1	0.206763
36	MGP	0.20396
37	APP	0.200635
38	PKM2	0.196271
39	ALB	0.192916
40	ALDOB	0.191622
41	KRT13	0.184968
42	C4A	0.180357
43	CALR	0.178267
44	APLP2	0.177456
45	ENO1	0.176893
46	HLA-A	0.174406
47	GSN	0.170338
48	COL1A2	0.169085
49	MYH9	0.16713
50	APOE	0.162155
51	HSP90B1	0.161607
52	UBC	0.161546
53	TG	0.159653
54	PSAP	0.157221
55	CD74	0.156078
56	NEAT1	0.153948
57	FTH1	0.153368
58	NDRG1	0.153239
59	IGFBP5	0.145839
60	RPS4X	0.137957
61	KRT5	0.132555
62	COL3A1	0.129958
63	GLUL	0.128859
64	RPS6	0.128434
65	SFTPA2	0.127213
66	VIM	0.123972
67	HP	0.123065
68	FLNA	0.121736
69	TMBIM6	0.120256
70	TIMP3	0.119542
71	LOC96610	0.119192
72	RPL4	0.119145
73	KRT6A	0.114154
74	TMSL3	0.112924
75	RPS18	0.110303
76	CANX	0.109255
77	RPLP0	0.108894
78	RPL19	0.108711
79	GNB2L1	0.108352
80	SFTPA1	0.107204
81	HSPA8	0.106825
82	TAGLN	0.10623
83	HLA-C	0.105356
84	RPLP1	0.105192
85	RPS11	0.104327
86	YWHAZ	0.102565
87	SERPINA1	0.102118
88	ITM2B	0.0994968
89	LDHA	0.0978062
90	HSP90AA1	0.097748
91	KRT8	0.09634
92	HSPA5	0.0947487
93	LTF	0.0941615
94	FOS	0.0927452
95	IGJ	0.0927119
96	RPS3	0.0924182
97	AQP1	0.0910715
98	EEF1G	0.0873077
99	EGR1	0.08679
100	EIF4G2	0.0866946
101	RPL5	0.0863842
102	PTMA	0.0860768
103	AZGP1	0.0852949
104	TMSB10	0.0850677
105	RPL13	0.0849152
106	MYL6	0.0839402
107	THBS1	0.0838518
108	AQP2	0.0837477
109	SPTBN1	0.082557
110	XBP1	0.0818973
111	H19	0.0817541
112	RPS8	0.0810758
113	ADAM6	0.0796896
114	RPL15	0.0792583
115	LGALS3BP	0.078286
116	RPL13A	0.0772926
117	HLA-DRA	0.0761391
118	RPS24	0.0757349
119	RPS19	0.0751261
120	RPL41	0.0751258
121	S100A6	0.0748068
122	TUBB	0.0742475
123	TNS1	0.0733669
124	TUBA1B	0.0726813
125	CSRP1	0.0719869
126	CD63	0.0717959
127	RPL11	0.0716864
128	KRT18	0.0711425
129	RPS20	0.0711123
130	KRT19	0.0710919
131	BSG	0.070867
132	SEPP1	0.0707845
133	PDIA3	0.070784
134	RPL10	0.0706304
135	C3	0.0704288
136	RGS5	0.0701006
137	ACTA2	0.0700926
138	SCD	0.0686607
139	RPL28	0.0684845
140	UBB	0.0680567
141	RPL7A	0.0679169
142	IGF2	0.0674948
143	CFL1	0.0674356
144	RPL30	0.0673823
145	ATP5B	0.0669697
146	RPL32	0.0666113
147	CD59	0.0665797
148	TAGLN2	0.066544
149	MSMB	0.0662292
150	RPL18	0.0647209
151	ANXA2	0.0643407
152	SQSTM1	0.0643205
153	RPS16	0.0642422
154	RPS14	0.0641284
155	CSDE1	0.0640361
156	HSPB1	0.0635456
157	NACA	0.0633419
158	SPP1	0.0617333
159	RPS9	0.0617067
160	DSP	0.0614583
161	ANXA1	0.060952
162	IGFBP4	0.060863
163	HNRNPA2B1	0.0606332
164	RPS12	0.0601634
165	IGFBP3	0.0595871
166	CD24	0.059192
167	RPL37A	0.0586748
168	HDLBP	0.0584994
169	ACTN4	0.0583126
170	HSPA1A	0.0581244
171	SRRM2	0.0580263
172	HLA-E	0.0572247
173	SLC12A1	0.0571351
174	RPL37	0.0571236
175	EPAS1	0.0570083
176	MYLK	0.0565239
177	PGK1	0.0561014
178	KRT17	0.0557911
179	RPS2	0.0557176
180	ARF1	0.0556791
181	MCL1	0.0555634
182	CCND1	0.0554846
183	H3F3B	0.0552864
184	ITGB1	0.0551392
185	EIF3CL	0.0549598
186	CD81	0.0547081
187	RPL31	0.054634
188	RPL27A	0.0545799
189	BGN	0.0543723
190	COL4A1	0.0539572
191	DUSP1	0.0538991
192	IGFBP7	0.0534545
193	ATP1B1	0.0532952
194	EIF1	0.0532521
195	RPS5	0.0529024
196	ATP5A1	0.0528417
197	RPL10A	0.052741
198	TPM4	0.052566
199	APOA2	0.052559
200	NCL	0.0524946
201	RPS23	0.0524562
202	SLC34A2	0.052225
203	SFRP1	0.0522069
204	COL4A2	0.0520545
205	CLTC	0.0519776
206	HNRNPK	0.0516395
207	KRT14	0.0513584
208	RPL23	0.051077
209	FCGBP	0.050996
210	LRP1	0.0508881
211	SLC25A6	0.0506185
212	DDX5	0.0505956
213	DHCR24	0.050289
214	TPI1	0.0501423
215	RPL26	0.0494424
216	KLK2	0.0491771
217	RHOA	0.0490757
218	PTRF	0.0489057
219	PPIB	0.0486666
220	MSN	0.0486359
221	RPS17	0.0478445
222	JUP	0.0477258
223	PEBP1	0.0474175
224	YWHAE	0.0473963
225	PTPRF	0.0472171
226	PFN1	0.0471538
227	SDC1	0.0471122
228	LDHB	0.0469476
229	PLEC	0.0464096
230	PCBP2	0.0461046
231	RPLP2	0.0459956
232	HSPG2	0.0459099
233	GANAB	0.0458199
234	CFB	0.0457591
235	DST	0.045695
236	HNRNPU	0.0451334
237	SPINT2	0.0444159
238	RPL12	0.0442481
239	FLNB	0.0441823
240	COL6A3	0.0438978
241	EZR	0.0438388
242	NPC2	0.0437357
243	CALD1	0.0435884
244	RHOB	0.0431602
245	SERPING1	0.0431468
246	CALM2	0.0428458
247	TLN1	0.0427726
248	PLXNB2	0.0426911
249	S100A11	0.0426138
250	GRN	0.0425199
251	MYL9	0.0424365
252	RPL35A	0.0424315
253	ADH1B	0.0423965
254	RPL24	0.0422581
255	PERP	0.0421555
256	CTNNB1	0.0418955
257	LOC647979	0.0417336
258	EIF4G1	0.0415521
259	COL6A2	0.0415363
260	CD9	0.0411646
261	SEC61A1	0.0409951
262	VEGFA	0.0409028
263	ZFP36	0.0408265
264	DDX17	0.0408136
265	DSTN	0.0408038
266	RPS15A	0.040706
267	NPM1	0.0405524
268	CDH1	0.0405005
269	FASN	0.0403704
270	ANPEP	0.040359
271	CTNNA1	0.0402743
272	NUMA1	0.0400178
273	EIF4A1	0.0397426
274	EIF4B	0.0396687
275	OAZ1	0.0395865
276	CD44	0.0394232
277	CEACAM6	0.039362
278	RPL29	0.039212
279	JUN	0.0391097
280	FSTL1	0.0390077
281	PLIN4	0.0388264
282	DYNC1H1	0.0388013
283	LMNA	0.0386832
284	CD164	0.0384281
285	ZFP36L1	0.0383854
286	NFE2L1	0.0383424
287	EMP1	0.0379262
288	RPN2	0.0377462
289	RPL27	0.0376792
290	HNRNPC	0.0376621
291	43345	0.0373171
292	SDC4	0.0372037
293	CYR61	0.0371901
294	SERF2	0.0371577
295	TIMP2	0.0369915
296	RPL6	0.0367192
297	CALM1	0.0365722
298	TPM1	0.0365148
299	APOD	0.036392
300	IFITM3	0.0361687
301	HSPD1	0.0361619
302	S100A9	0.036136
303	BTF3	0.0360504
304	CTNND1	0.0360475
305	C1S	0.0359791
306	RPS27A	0.0357731
307	EIF4A2	0.0356008
308	SPARCL1	0.0355881
309	GPI	0.0355717
310	AES	0.0355042
311	UBA52	0.0354897
312	ADAR	0.0352316
313	TGOLN2	0.034909
314	SOD2	0.0349037
315	LAPTM4A	0.0346725
316	BCAM	0.0346328
317	OS9	0.0345989
318	KRT7	0.0345514
319	EIF3L	0.0345435
320	CTGF	0.0344188
321	GNB1	0.0342253
322	PRDX1	0.0341304
323	RPL35	0.0341143
324	NUCKS1	0.0340949
325	SLC39A6	0.0340188
326	LAMP1	0.0340099
327	CAPNS1	0.0339154
328	RPS25	0.0338137
329	GSTP1	0.0336786
330	MLEC	0.033641
331	MYL12B	0.0335278
332	RPL14	0.0335019
333	EEF1D	0.0333941
334	CLDN4	0.0332598
335	CAV1	0.0329084
336	EEF1A1P9	0.0328381
337	DES	0.0327201
338	RPL36	0.0327111
339	UBA1	0.0326742
340	YWHAB	0.032598
341	TGFBI	0.0325754
342	RPL34	0.0323599
343	VCP	0.0320222
344	KLF6	0.0319518
345	RPSAP58	0.0319358
346	RPN1	0.0318191
347	PTTG1IP	0.0317171
348	PCBP1	0.0316738
349	TACSTD2	0.0315651
350	TSC22D1	0.0315623
351	LUM	0.031522
352	NUCB1	0.0315049
353	TMED10	0.0314859
354	NCRNA00188	0.0313952
355	AP2M1	0.0313759
356	LASS2	0.0313617
357	RTN4	0.0313361
358	SLC25A3	0.0312949
359	CEACAM5	0.0312941
360	AEBP1	0.0311675
361	TPM3	0.0311637
362	CNDP2	0.031156
363	PPP1CB	0.0310702
364	DAZAP2	0.0309174
365	KRT6B	0.0308472
366	SPTAN1	0.0307998
367	SAT1	0.0307713
368	DDX3X	0.0307428
369	CA12	0.0307074
370	RPS13	0.0306695
371	SLC25A5	0.0306428
372	C1R	0.0305503
373	FGA	0.0304939
374	PDIA6	0.0303589
375	AGRN	0.0303456
376	COL6A1	0.0303236
377	RRBP1	0.0303105
378	ATP2A2	0.0302043
379	SCGB2A2	0.0300988
380	CNBP	0.0299405
381	YBX1	0.0298655
382	CAP1	0.0298511
383	VWF	0.0298465
384	RPL22	0.0296861
385	ASS1	0.0296738
386	KRT16	0.0294816
387	CD46	0.0293928
388	SLC26A3	0.0292909
389	TMEM59	0.0292827
390	PRPF8	0.0292549
391	MAGED2	0.0292509
392	HLA-DPA1	0.0291474
393	IQGAP1	0.0289061
394	NME2	0.0288698
395	NONO	0.0286133
396	GPNMB	0.0285328
397	CLIC1	0.0284953
398	SCARB2	0.0284741
399	FAU	0.0284109
400	ERGIC1	0.0283365
401	C7	0.0283247
402	ERBB2	0.028316
403	ALDH2	0.0282969
404	PRKAR1A	0.0282535
405	TUBB2C	0.0282513
406	YWHAQ	0.0281803
407	CLSTN1	0.028062
408	WDR1	0.0280474
409	HDGF	0.0280352
410	KRT4	0.028013
411	MMP2	0.0279284
412	DDR1	0.0279239
413	XRCC5	0.0278116
414	PPP2R1A	0.02778
415	PDIA4	0.0277579
416	ITM2C	0.0277393
417	CD151	0.027684
418	TMEM66	0.0275218
419	HUWE1	0.0274132
420	TMED2	0.0273962
421	SERINC1	0.0273908
422	MAP4	0.0273784
423	NAP1L1	0.0273159
424	ABHD2	0.0273085
425	BHLHE40	0.0272358
426	H1F0	0.0271884
427	COPA	0.0271875
428	ANXA5	0.0270929
429	MATR3	0.0268556
430	RPS21	0.0268123
431	HSPA9	0.0268061
432	EPHX1	0.0267599
433	MACF1	0.0267461
434	TMEM123	0.0267345
435	AQP3	0.0265156
436	CST3	0.0263332
437	NCOA4	0.0263187
438	AP2B1	0.0262381
439	CRYAB	0.0262114
440	MUC7	0.0261774
441	GOLM1	0.0261492
442	BAT2	0.0260717
443	ACTG2	0.0259846
444	GATM	0.0259845
445	TIMP1	0.0259699
446	TXNDC5	0.0259408
447	XRCC6	0.0259337
448	NR4A1	0.0258908
449	LGALS3	0.0256818
450	GABARAP	0.0256349
451	ACSL1	0.0256271
452	BTG2	0.0256076
453	ASAH1	0.0255947
454	PTGES3	0.0255544
455	GNS	0.0254742
456	ORM1	0.0254575
457	TGM2	0.0253631
458	43352	0.0253583
459	MYL12A	0.0252671
460	EIF5A	0.0252543
461	RPS7	0.0252202
462	RAB7A	0.025181
463	FHL1	0.0251739
464	LASP1	0.0251629
465	GNAI2	0.0251599
466	CLIC4	0.0251009
467	HLA-DRB1	0.0250588
468	ALDH1A1	0.0250531
469	TF	0.0249534
470	CCT3	0.0248927
471	ZFP36L2	0.0248541
472	ARHGDIA	0.0248279
473	DDB1	0.0247556
474	GTF2IP1	0.0246841
475	ITGA3	0.0246764
476	EPCAM	0.0246321
477	ACADVL	0.0245945
478	EIF3A	0.0245808
479	MUC1	0.0244629
480	CAPN2	0.0244622
481	SERBP1	0.0244462
482	KDELR2	0.0244372
483	AIF1L	0.0244053
484	STOM	0.0243977
485	FBLN1	0.0243964
486	ACTN1	0.024284
487	STAT3	0.0242822
488	TM9SF3	0.0242524
489	TRAM1	0.024241
490	TKT	0.0242202
491	HNRNPA1	0.024204
492	TOMM20	0.0242003
493	F11R	0.0241695
494	STAT1	0.0240949
495	EIF3E	0.0240862
496	SYNM	0.0240577
497	SNRNP200	0.0240402
498	MIF	0.0240302
499	MYO1C	0.0240032
500	RAC1	0.0239915
501	RPL17	0.0239769
502	PRKCSH	0.023967
503	COX4I1	0.0239645
504	FAM129B	0.0239355
505	MRFAP1	0.0239186
506	SF3B1	0.0238807
507	GLTSCR2	0.0238684
508	CALM3	0.023779
509	SERPINA3	0.0237777
510	SET	0.0237522
511	CHD4	0.0237439
512	RPL38	0.0237411
513	TAPBP	0.0236873
514	MMP14	0.0236434
515	ACTR2	0.0236082
516	RPS10	0.023573
517	COL18A1	0.0235484
518	FOSB	0.02351
519	SURF4	0.0234418
520	PODXL	0.0234048
521	HADHA	0.0232386
522	ARL6IP1	0.0232007
523	TNC	0.0231622
524	CAPRIN1	0.0231322
525	BCAP31	0.0230962
526	POSTN	0.0230944
527	SON	0.0230558
528	LAMP2	0.0230447
529	RPS3A	0.0229404
530	RDH11	0.0228537
531	S100A10	0.0228196
532	CDC42	0.022816
533	LAMB2	0.0227679
534	ARF3	0.0226681
535	ADD1	0.0226243
536	MT2A	0.0225556
537	GDI2	0.0225278
538	RPSA	0.0224671
539	PRDX6	0.0224358
540	SKP1	0.0223809
541	PTMS	0.0223559
542	HNRNPUL1	0.0223471
543	LYZ	0.0223044
544	PLD3	0.0222461
545	ATF4	0.0222292
546	ST13	0.0221909
547	RPS29	0.0221414
548	TMBIM1	0.0221113
549	CTDSP2	0.0220945
550	CTTN	0.0219601
551	CYB5R3	0.0219448
552	CIRBP	0.0219382
553	JUNB	0.0218963
554	CXCL14	0.0218948
555	FABP4	0.0218627
556	GPR56	0.0218394
557	POLR2A	0.0217999
558	TSPAN1	0.0217805
559	CYBRD1	0.0217741
560	CAPN1	0.0217153
561	SYNGR2	0.0216503
562	SFN	0.0216471
563	DDOST	0.0216334
564	ECE1	0.0216142
565	LRP10	0.0216136
566	FAT1	0.0215902
567	CCNI	0.0215847
568	LAMC1	0.0214918
569	GRINA	0.0214759
570	RHOC	0.0213543
571	VTN	0.0213526
572	HMGN2	0.0212392
573	ARHGEF12	0.0211733
574	HMGB1	0.0211261
575	PYGB	0.0211029
576	PALLD	0.0210873
577	B4GALT1	0.0210667
578	AGR2	0.021045
579	ANXA2P2	0.0210385
580	BRD2	0.0210339
581	S100A8	0.0208977
582	TRIM28	0.0208922
583	CSTB	0.0208492
584	WNK1	0.0207094
585	ITGA6	0.0206761
586	KTN1	0.0206749
587	CSNK1A1	0.0206258
588	RAB1B	0.0206237
589	XIST	0.0205987
590	CAST	0.0205766
591	USP22	0.0204746
592	ASPH	0.020468
593	SSR2	0.0204212
594	TM4SF1	0.0204148
595	TGFBR2	0.0203881
596	GLUD1	0.0203435
597	MVP	0.0203371
598	ILF3	0.0203097
599	SLC44A2	0.0202659
600	UBE2D3	0.0202429
601	TPM2	0.0201967
602	KRT15	0.0201947
603	FGG	0.0201235
604	FKBP8	0.0200964
605	CTSZ	0.0200477
606	CKB	0.0200402
607	PDLIM5	0.0199606
608	SLC38A1	0.0198747
609	RBP4	0.0198598
610	COPG	0.019856
611	ELF3	0.0198176
612	LITAF	0.0196907
613	PTBP1	0.0196701
614	C1orf43	0.0196402
615	ATP5G2	0.0195991
616	GLG1	0.0194603
617	CD36	0.0194406
618	LAMB1	0.0193617
619	GHITM	0.0193601
620	REEP5	0.0193207
621	MAL2	0.0193172
622	APH1A	0.0192973
623	BAT2L1	0.019238
624	TSPAN3	0.0191897
625	CEACAM7	0.0191496
626	HNRNPL	0.0191083
627	CTSH	0.019097
628	FGB	0.0190102
629	EIF4H	0.0189811
630	TSC22D3	0.0189514
631	RAD21	0.0188919
632	VCL	0.018852
633	EIF4EBP2	0.0188251
634	ARPC2	0.0187317
635	MYADM	0.018723
636	ST14	0.0186963
637	TUBA1A	0.0186638
638	HNRNPA3	0.018636
639	PCK1	0.0185788
640	PFDN5	0.0185643
641	EMP2	0.0185511
642	PEA15	0.0185109
643	BAT1	0.0185023
644	TTC3	0.0184648
645	VAT1	0.0184581
646	PLS3	0.0184193
647	ANXA11	0.0184119
648	CTSC	0.0184046
649	LY6E	0.0183616
650	CDH16	0.0183329
651	SLC38A2	0.0183156
652	ADIPOQ	0.0183117
653	TPP1	0.018264
654	SF3B2	0.0182378
655	ATP6AP1	0.0181495
656	PSMD2	0.0180443
657	SFRS3	0.0180403
658	NAPSA	0.0180165
659	LGALS4	0.0179857
660	IRF2BP2	0.0178872
661	SLC2A1	0.0178657
662	AHCY	0.0178542
663	PDK4	0.0178122
664	APOC1	0.0177996
665	YWHAG	0.0177225
666	SLC40A1	0.0177166
667	ERGIC3	0.0177127
668	RNF213	0.0177124
669	CAPZB	0.0177033
670	EIF2S3	0.017686
671	SERP1	0.0176817
672	MAT2A	0.0176633
673	PPDPF	0.0176599
674	LARP1	0.0176018
675	SND1	0.0175901
676	CCT7	0.0175427
677	ERBB3	0.0175398
678	PPIA	0.0175327
679	ITGB4	0.0175206
680	PRDX5	0.0174903
681	TUBA1C	0.0174885
682	MTCH1	0.0174875
683	CRIM1	0.0174526
684	PLVAP	0.0174491
685	BAT3	0.0173968
686	FAM120A	0.0173939
687	CNN3	0.0173878
688	FABP1	0.0173567
689	ABLIM1	0.0173
690	TMEM30A	0.0172852
691	KIAA0100	0.0172717
692	HLA-DPB1	0.0172224
693	VDAC1	0.0172085
694	KIAA1522	0.017151
695	PRKDC	0.0171301
696	TM9SF2	0.0170945
697	CCT5	0.0170778
698	RPS15	0.0170744
699	IGF2R	0.0170588
700	EIF3D	0.0170579
701	MARCKSL1	0.0170423
702	KPNB1	0.0169918
703	ACLY	0.0169638
704	SYNPO2	0.0169511
705	EIF3H	0.0169497
706	FKBP4	0.0169026
707	RAB5B	0.0168783
708	NBL1	0.0168768
709	TUFM	0.0168181
710	FKBP1A	0.0168166
711	GNB2	0.0168026
712	HNRNPF	0.0167548
713	NOTCH2	0.0167148
714	GOLGB1	0.0167045
715	DSG2	0.0166475
716	PICALM	0.0165988
717	SF1	0.0165946
718	CTSA	0.0165721
719	TNKS1BP1	0.01657
720	WARS	0.0165485
721	RTN3	0.0164852
722	JAK1	0.0164654
723	WASF2	0.0164647
724	SYNE2	0.0164636
725	CRTAP	0.016454
726	LAMC2	0.0164389
727	KIF5B	0.0164361
728	KDELR1	0.0164307
729	SEC31A	0.0164287
730	MORF4L2	0.0164147
731	ARCN1	0.0163239
732	FUS	0.0163188
733	LGALS1	0.016299
734	CNOT1	0.016273
735	NCKAP1	0.0162488
736	HYOU1	0.0162305
737	MAGED1	0.0161799
738	BTG1	0.0161344
739	SFPQ	0.0161047
740	ATN1	0.016096
741	BAT2L2	0.0160769
742	RBM3	0.0160683
743	OGDH	0.01606
744	MYH14	0.0160425
745	ZFAND5	0.0160238
746	IVNS1ABP	0.0160091
747	ITGAV	0.0159142
748	SOD1	0.0158748
749	EIF5	0.015865
750	GPX1	0.015862
751	MYOF	0.0158572
752	EIF3B	0.0158512
753	SPINT1	0.0158498
754	NBR1	0.0158489
755	HIF1A	0.0158459
756	MME	0.015824
757	NDRG2	0.0157978
758	ECHS1	0.0157571
759	ACO2	0.0157269
760	PFKL	0.0156959
761	ANXA6	0.0156872
762	SRP14	0.0156855
763	TMPRSS2	0.0156818
764	PFKFB3	0.0156575
765	EIF2AK1	0.0156433
766	RPL23A	0.0156172
767	COL5A1	0.0156166
768	QSOX1	0.0156043
769	ARF4	0.0155323
770	MDH2	0.0155124
771	H3F3A	0.0155046
772	PRDX2	0.0154904
773	SEC62	0.0154859
774	CCT6A	0.0154831
775	RNASE1	0.0154794
776	TNFSF10	0.0154758
777	PSMB4	0.0154626
778	SRP9	0.0154351
779	LMAN1	0.0154015
780	SDCBP	0.0153877
781	HINT1	0.0153754
782	ANXA4	0.0153725
783	COL12A1	0.0153576
784	LAMB3	0.0153534
785	EDF1	0.015315
786	CAT	0.0153005
787	ENSA	0.0152789
788	SLC3A2	0.0152357
789	PPT1	0.0152225
790	SUN2	0.0152024
791	EEF1B2	0.0151794
792	CALU	0.0151792
793	NOTCH3	0.015172
794	BZW1	0.0151703
795	PTP4A1	0.0151571
796	CDKN1A	0.0151462
797	KIF1C	0.0151422
798	ENG	0.0151061
799	CHCHD2	0.0151054
800	HNRNPM	0.0150681
801	EWSR1	0.0150463
802	LTBP2	0.0150372
803	DHX9	0.0150191
804	DAP	0.0149958
805	ATP6AP2	0.0149928
806	STAT6	0.0149703
807	ELOVL5	0.0149703
808	DCTN1	0.0149496
809	MLF2	0.0149206
810	PBXIP1	0.0149037
811	PDLIM1	0.0148718
812	ZYX	0.0148365
813	RAD23B	0.0148362
814	LAPTM5	0.014784
815	SREBF2	0.0147838
816	MAZ	0.0147702
817	TMEM176B	0.0147695
818	SCNN1A	0.0147612
819	ACTR3	0.0147395
820	ECH1	0.0147325
821	ATP5G3	0.0147131
822	UBR4	0.0147084
823	DAG1	0.0147078
824	PGAM1	0.0147054
825	VCAN	0.0146892
826	SFRS1	0.0146877
827	UQCRC1	0.0146832
828	UQCRC2	0.0146767
829	TFRC	0.0146373
830	ATP5E	0.0146125
831	METTL7A	0.014604
832	MLLT6	0.0145961
833	MORF4L1	0.0145832
834	LPL	0.014554
835	MGLL	0.0145533
836	KIAA1324	0.0145346
837	SERPINH1	0.0145328
838	MGST1	0.0144806
839	APOA1	0.0144798
840	CS	0.0143974
841	SSR1	0.0143361
842	ETS2	0.01433
843	TNIP1	0.0143086
844	ST6GAL1	0.014276
845	PKP1	0.0142744
846	SRPR	0.0142549
847	SYNPO	0.0142182
848	HNRNPH1	0.0142143
849	PAM	0.014214
850	LCP1	0.0142107
851	LUZP6	0.0141889
852	PGRMC1	0.0141287
853	RAB11FIP1	0.0141248
854	KNG1	0.0141237
855	HERPUD1	0.0141184
856	MARCKS	0.0141081
857	HIPK2	0.0141007
858	PPAP2B	0.0140763
859	HP1BP3	0.0140477
860	SERINC2	0.0140249
861	KIAA0494	0.013999
862	SLC45A3	0.0139886
863	SELENBP1	0.0139455
864	MKNK2	0.0139357
865	EIF3I	0.0139355
866	IDH1	0.01393
867	AKT1	0.0139209
868	GJA1	0.0138497
869	NCOR2	0.0138424
870	SHISA5	0.0138394
871	STARD7	0.0138268
872	PDCD6IP	0.0137794
873	RNF10	0.0137601
874	TMED9	0.0137569
875	CHD3	0.0137374
876	PCYOX1	0.013734
877	RAN	0.0137268
878	DNAJB1	0.0137001
879	CPD	0.0136999
880	CMPK1	0.0136963
881	COX7C	0.0136959
882	SFRS5	0.0136829
883	FXYD3	0.0136746
884	CPB1	0.0136604
885	ARL6IP5	0.0136561
886	AKR1C1	0.0136553
887	DIAPH1	0.0136553
888	SLPI	0.0136553
889	SLC39A7	0.0136485
890	ERP29	0.0136219
891	TUG1	0.0136212
892	PPP2R4	0.0136173
893	FURIN	0.0136151
894	IGFBP2	0.0135851
895	AHCYL1	0.0135813
896	PRDX3	0.0135794
897	RBM39	0.0135637
898	CES1	0.0135524
899	PDCD4	0.0135406
900	SH3BGRL3	0.0135366
901	ATP2B4	0.0135264
902	MALAT1	0.0135218
903	SLC9A3R1	0.0135022
904	AZIN1	0.0134979
905	SPRR3	0.0134829
906	COPB2	0.0134678
907	DDIT4	0.0134677
908	PLEKHB2	0.0134672
909	TNS3	0.0134486
910	RERE	0.0134343
911	ODC1	0.0134277
912	GPX4	0.0134274
913	MYH2	0.0134097
914	ARPP19	0.0133834
915	RSL1D1	0.0133794
916	CHMP4B	0.0133602
917	SRCAP	0.013342
918	LRPPRC	0.0133359
919	QARS	0.0133205
920	CXCL12	0.013314
921	HBB	0.0133117
922	IPO7	0.0132981
923	TALDO1	0.0132967
924	SLC1A5	0.0132827
925	IDH2	0.0132818
926	PMEPA1	0.0132739
927	NOMO1	0.0132704
928	TACC1	0.0132689
929	RAB11A	0.0132528
930	SYNCRIP	0.0132409
931	C20orf3	0.0132397
932	SGK1	0.0132353
933	NDUFA4L2	0.0132111
934	EID1	0.0132089
935	CDV3	0.0132006
936	ARPC3	0.0131978
937	SCP2	0.0131959
938	HNRPDL	0.0131956
939	FCGRT	0.0131697
940	IER2	0.0131693
941	ILF2	0.0131251
942	PARK7	0.0131111
943	TCP1	0.0131106
944	AGER	0.0131042
945	NDFIP1	0.0130833
946	TAX1BP1	0.0130724
947	FBN1	0.0130549
948	LAMA5	0.01304
949	FLOT1	0.0130313
950	ZNF664	0.0130241
951	SUMF2	0.0129922
952	PRNP	0.0129875
953	CCT4	0.012982
954	COPZ1	0.0129442
955	CSDA	0.0129354
956	MGAT1	0.0129075
957	CHP	0.0128971
958	RAB1A	0.0128951
959	S100A16	0.0128777
960	RBBP4	0.0128737
961	PARP1	0.0128684
962	ATP6V0E1	0.0128271
963	ATP6V0C	0.0128257
964	JUND	0.012809
965	ITGB5	0.0127927
966	IFI30	0.012792
967	LGMN	0.0127919
968	RAB10	0.0127857
969	SORL1	0.0127787
970	PDXDC1	0.0127746
971	USP9X	0.0127732
972	HNRNPD	0.0127585
973	PHB2	0.0127381
974	MCAM	0.0127212
975	TOP2B	0.0127142
976	PPL	0.0127032
977	PSME1	0.0126979
978	PAPOLA	0.0126954
979	CD68	0.0126922
980	NFKBIA	0.0126742
981	TRIM29	0.0126591
982	PJA2	0.012657
983	FXYD2	0.0126375
984	HK1	0.0126258
985	CNN2	0.0125875
986	PPP1CA	0.0125831
987	UQCRB	0.0125689
988	TBC1D9B	0.0125657
989	SSR3	0.0125477
990	G3BP2	0.0125445
991	IDS	0.0125407
992	TPD52	0.0125169
993	PLIN1	0.012505
994	ATP5C1	0.0124944
995	UTRN	0.0124926
996	ARPC5	0.0124876
997	SFRP2	0.0124869
998	CPE	0.0124658
999	PRSS23	0.0124518
1000	CDC42BPB	0.0124442
1001	TBL1XR1	0.0124228
1002	SOCS3	0.012421
1003	MPZL1	0.0124064
1004	NFE2L2	0.0123943
1005	SORT1	0.0123798
1006	SF3B3	0.0123688
1007	ESYT1	0.0123332
1008	AMFR	0.0123328
1009	SSRP1	0.0123211
1010	LMAN2	0.012321
1011	MTDH	0.012303
1012	SEL1L	0.0122943
1013	ALDH3A2	0.012288
1014	C6orf106	0.0122829
1015	RNH1	0.0122775
1016	STAU1	0.01225
1017	PLOD1	0.0122497
1018	AKAP13	0.0122487
1019	SFRS6	0.0122339
1020	ADAMTS1	0.0122266
1021	FLOT2	0.0122048
1022	C19orf63	0.0122034
1023	PRSS8	0.012201
1024	ARHGDIB	0.0121985
1025	DNM2	0.0121741
1026	RAB6A	0.0121549
1027	APOL1	0.0121438
1028	PIGT	0.0121318
1029	MAPK1	0.0121313
1030	ARF6	0.0121305
1031	ARPC4	0.0121275
1032	DPYSL3	0.0121241
1033	H2AFV	0.0121199
1034	EHD2	0.0121069
1035	PDXK	0.0120788
1036	NDUFA4	0.0120591
1037	PGD	0.0120566
1038	HNRNPA0	0.0120523
1039	H2AFY	0.0120486
1040	NARS	0.0120458
1041	THRAP3	0.0120342
1042	ZMIZ1	0.0120188
1043	C7orf42	0.0120164
1044	AP3D1	0.0120121
1045	RAB5C	0.0120114
1046	CSNK1D	0.0120086
1047	NDST1	0.0120057
1048	CX3CL1	0.0119875
1049	SEPN1	0.0119852
1050	COPB1	0.0119835
1051	SEPW1	0.0119751
1052	SYPL1	0.0119738
1053	HN1L	0.0119724
1054	KHDRBS1	0.0119635
1055	MGEA5	0.0119361
1056	LTBP4	0.0119324
1057	IFI27	0.0119265
1058	EIF3K	0.0119252
1059	ADH5	0.011925
1060	HADHB	0.0119016
1061	SDHA	0.0118998
1062	CNN1	0.0118971
1063	SEC16A	0.0118936
1064	MET	0.0118814
1065	LPCAT1	0.0118731
1066	GAA	0.011869
1067	AP1B1	0.011834
1068	CAPG	0.0118333
1069	COL5A2	0.0118152
1070	DYNLL1	0.0118053
1071	GSPT1	0.0117942
1072	GLO1	0.0117886
1073	BCL2L1	0.0117791
1074	ALCAM	0.0117689
1075	NTRK2	0.0117682
1076	VAPA	0.0117544
1077	SAA1	0.0117375
1078	GNG12	0.0117284
1079	ATP2C1	0.0117249
1080	CCT8	0.0117163
1081	MAPKAPK2	0.0117041
1082	DGCR2	0.0116945
1083	MAOA	0.0116896
1084	HM13	0.0116764
1085	ARRDC3	0.0116649
1086	GPD1	0.0116615
1087	WDR6	0.0116528
1088	XPO1	0.0116388
1089	WBP2	0.0116379
1090	PAFAH1B1	0.0116376
1091	ICAM1	0.0116305
1092	YAP1	0.0116298
1093	NRP1	0.0116287
1094	GRB2	0.0116189
1095	CCDC80	0.0116134
1096	PHB	0.0116113
1097	SERPINF1	0.0116054
1098	RBM47	0.0115938
1099	NCSTN	0.0115768
1100	LAPTM4B	0.0115754
1101	ZG16B	0.0115703
1102	IPO5	0.0115668
1103	ZC3H11A	0.0115512
1104	PXN	0.011549
1105	COX6C	0.0115436
1106	MYO1D	0.0115176
1107	OLFM4	0.0115104
1108	NPNT	0.0115047
1109	CP	0.0114967
1110	SH3BGRL	0.0114583
1111	KRT6C	0.0114424
1112	MBNL1	0.0114422
1113	RBMX	0.0114339
1114	MMP7	0.01142
1115	AMBP	0.0114196
1116	MXRA7	0.0114106
1117	APOB	0.0113818
1118	SNX1	0.0113783
1119	HECTD1	0.0113604
1120	FLII	0.0113277
1121	SMARCA2	0.011321
1122	RCC2	0.01132
1123	EFEMP1	0.0113124
1124	43358	0.01131
1125	CTDSP1	0.0113038
1126	ANXA7	0.0112988
1127	HMGCS2	0.0112918
1128	KCTD12	0.0112657
1129	PUM2	0.0112529
1130	COX6B1	0.0112506
1131	TNXB	0.0112207
1132	MBTPS1	0.0112113
1133	LRRFIP1	0.011197
1134	CA2	0.0111862
1135	HTRA1	0.0111765
1136	CPNE3	0.0111675
1137	AARS	0.011164
1138	CYFIP2	0.0111569
1139	ESYT2	0.0111553
1140	SSR4	0.0111429
1141	ARHGAP1	0.0111244
1142	IGF1R	0.0111181
1143	TRIP12	0.0111049
1144	PTPLAD1	0.0110793
1145	MDH1	0.011077
1146	STC2	0.0110756
1147	EXOC7	0.0110614
1148	NAPA	0.0110607
1149	CES2	0.0110543
1150	DNAJA1	0.0110473
1151	CYCS	0.0110366
1152	AOC3	0.0110335
1153	DDX6	0.0110288
1154	DBI	0.0110197
1155	MT1G	0.011014
1156	C1orf144	0.0110002
1157	YME1L1	0.0109805
1158	SLC26A2	0.0109625
1159	ERRFI1	0.0109167
1160	CCDC47	0.0109157
1161	DDX24	0.0109156
1162	STT3A	0.0108846
1163	C1QB	0.0108825
1164	MXRA5	0.0108743
1165	FBXL5	0.0108719
1166	SREBF1	0.0108714
1167	LIMA1	0.0108489
1168	PLIN2	0.0108455
1169	NAMPT	0.0108454
1170	LRRC59	0.0108368
1171	STK24	0.0108341
1172	SDF4	0.0108208
1173	IMPDH2	0.010816
1174	TNRC18	0.010807
1175	S100A2	0.0107983
1176	GFPT1	0.010798
1177	CYFIP1	0.0107725
1178	C11orf58	0.0107642
1179	ANTXR1	0.0107616
1180	TXN	0.0107608
1181	UBXN4	0.010757
1182	RANBP2	0.010714
1183	SLC39A1	0.0107114
1184	PDZK1IP1	0.0107056
1185	DAB2	0.0107035
1186	ATP6V1A	0.0106799
1187	CLPTM1	0.0106584
1188	RALY	0.0106457
1189	CBX5	0.0106154
1190	PA2G4	0.0106081
1191	C6orf62	0.0105971
1192	VPS24	0.0105902
1193	C4orf3	0.0105855
1194	FKBP9	0.0105709
1195	BCLAF1	0.0105668
1196	TARDBP	0.0105599
1197	MYO6	0.0105552
1198	C10orf10	0.0105399
1199	ADIPOR1	0.0105384
1200	KIAA1191	0.0105204
1201	LTBP3	0.0105193
1202	ARPC1B	0.0105161
1203	M6PR	0.0105103
1204	MCCC2	0.0105074
1205	SSFA2	0.0104898
1206	SMARCA4	0.0104829
1207	CLDN1	0.0104623
1208	ADAM9	0.010439
1209	PDGFRB	0.0103994
1210	ALDH9A1	0.0103942
1211	ATP5F1	0.0103939
1212	SF3A1	0.0103932
1213	CCT2	0.0103776
1214	IFITM1	0.0103742
1215	SUB1	0.0103727
1216	PBX1	0.0103713
1217	SPON2	0.0103576
1218	EIF5B	0.0103548
1219	NET1	0.0103526
1220	UGP2	0.010342
1221	GAS6	0.0103365
1222	HNRNPUL2	0.0103342
1223	PTPN11	0.0103276
1224	HSD17B4	0.0103204
1225	EPRS	0.0103151
1226	IL32	0.0103045
1227	SORBS1	0.0102962
1228	FAM168B	0.0102839
1229	NNMT	0.0102772
1230	SLC25A39	0.0102692
1231	UBQLN1	0.0102633
1232	GLS	0.0102562
1233	ZBTB4	0.0102383
1234	SOX4	0.0102355
1235	DCAF7	0.0102336
1236	MCFD2	0.0102256
1237	DUSP6	0.0102226
1238	RNF187	0.0102188
1239	TXNRD1	0.0102178
1240	NFIX	0.0102123
1241	NTN4	0.0102049
1242	ZC3H7B	0.0102035
1243	TSPYL1	0.0102015
1244	MAPRE1	0.0102009
1245	TAP1	0.0101776
1246	FDFT1	0.0101759
1247	C10orf116	0.0101749
1248	MFN2	0.0101603
1249	AFF4	0.0101602
1250	LRP2	0.0101557
1251	PIK3R1	0.0101535
1252	COL17A1	0.0101517
1253	SHC1	0.0101472
1254	SLC38A10	0.0101435
1255	ATP5O	0.0101414
1256	ROD1	0.010115
1257	SFRS2	0.0101099
1258	ATP1B3	0.0100799
1259	TPR	0.0100742
1260	UBAP2L	0.0100663
1261	PDIA3P	0.0100461
1262	ATXN7L3B	0.0100214
1263	IFI6	0.0100213
1264	OGT	0.010017
1265	YWHAH	0.0100051
1266	CTSS	0.0100024
1267	KDM2A	0.010002
1268	GOT2	0.00999886
1269	TBC1D9	0.0099847
1270	SUPT6H	0.00998439
1271	MFAP4	0.00996027
1272	SUPT5H	0.00995992
1273	C3orf10	0.00994705
1274	SEC24C	0.00993737
1275	CBX3	0.00991829
1276	RAB14	0.00990437
1277	HSD11B2	0.00990206
1278	ACAA2	0.00989843
1279	SLC44A4	0.00989761
1280	SCGB1A1	0.00988663
1281	LSM14A	0.00986587
1282	COTL1	0.00986159
1283	GPRC5A	0.00985957
1284	SVIL	0.00984606
1285	CASC4	0.00983317
1286	43350	0.00982057
1287	CREG1	0.0098045
1288	NEDD4L	0.00980168
1289	SNX3	0.00979218
1290	PVRL2	0.00978746
1291	RPL36AL	0.0097865
1292	TMEM109	0.00978368
1293	PLAT	0.0097688
1294	STIP1	0.0097679
1295	IL13RA1	0.00976247
1296	SUMO2	0.00974668
1297	CDC37	0.00974342
1298	TSPAN14	0.00972469
1299	LRPAP1	0.00971405
1300	THY1	0.00971013
1301	FAM134A	0.00970184
1302	GRLF1	0.0096976
1303	ADAM15	0.00969199
1304	PRPF6	0.00968658
1305	NQO1	0.00967406
1306	UPF1	0.00965163
1307	RETSAT	0.00963597
1308	ITPR3	0.00961671
1309	DYNC1LI2	0.00959388
1310	SDC2	0.00959015
1311	GOLPH3	0.00958974
1312	CAPZA1	0.00956004
1313	S100A14	0.00954647
1314	NDUFA13	0.0095222
1315	ZDHHC5	0.00950492
1316	EPN1	0.00950032
1317	SLC44A1	0.00949636
1318	BMPR2	0.0094774
1319	PSMD8	0.00947611
1320	PPP1CC	0.00947422
1321	SLC7A8	0.00945829
1322	LSR	0.00945048
1323	SMARCC1	0.00943605
1324	UBE2V1	0.0094354
1325	THBS2	0.00943008
1326	H2AFZ	0.0094274
1327	SLC3A1	0.00940354
1328	JAG1	0.00940277
1329	ATP5L	0.00940233
1330	SULF2	0.00938671
1331	IARS2	0.00937543
1332	PCM1	0.00937509
1333	AFF1	0.00937225
1334	CLPTM1L	0.00936545
1335	SNRPN	0.00935248
1336	ETF1	0.00935135
1337	CAPZA2	0.00934185
1338	KARS	0.00932535
1339	PABPC4	0.00932229
1340	GUK1	0.00931777
1341	NAA50	0.00930992
1342	NDUFB9	0.00930775
1343	TRIB1	0.00930484
1344	SCPEP1	0.00930109
1345	AMD1	0.0092994
1346	KIAA1217	0.0092975
1347	GPR116	0.00929507
1348	MDK	0.009292
1349	SNRPB	0.00929168
1350	KIAA0174	0.00928895
1351	ENAH	0.00927079
1352	MYH10	0.00927077
1353	CORO1C	0.00927022
1354	ADI1	0.00926513
1355	ACSL3	0.00926292
1356	GCN1L1	0.00925473
1357	U2AF2	0.00924799
1358	NPTN	0.00923649
1359	PSMA7	0.00923301
1360	C1QA	0.00923269
1361	TSPAN13	0.0092287
1362	COX8A	0.00922446
1363	WFDC2	0.00922245
1364	GPR107	0.00921404
1365	NGRN	0.00921126
1366	MMP11	0.00920948
1367	FOSL2	0.00920618
1368	WAC	0.00920302
1369	FKBP5	0.00919719
1370	CREB3L2	0.00918702
1371	ANO6	0.00918272
1372	PPA1	0.00917141
1373	SP1	0.00917064
1374	PARM1	0.00915071
1375	PPP2CA	0.00913621
1376	CRABP2	0.00913223
1377	GSTK1	0.0091321
1378	BNIP3L	0.00912965
1379	AKR1A1	0.00912593
1380	UBTF	0.00911998
1381	MLLT4	0.0091191
1382	GTF2I	0.00911728
1383	TNFRSF1A	0.00910428
1384	AKT2	0.00909517
1385	SERPINE1	0.00906734
1386	C9orf5	0.0090658
1387	SARS	0.00905708
1388	USP7	0.0090569
1389	PRCP	0.00905657
1390	PUF60	0.00904926
1391	IMPAD1	0.00904093
1392	SMARCE1	0.00900244
1393	KIAA0368	0.00899713
1394	VPS35	0.00898978
1395	ILK	0.00898551
1396	HDAC1	0.00898177
1397	UBE2Z	0.00897023
1398	HNRNPAB	0.0089452
1399	WDR82	0.00893334
1400	EIF6	0.00892936
1401	ABCA3	0.00892437
1402	FAM38A	0.00892173
1403	TFF3	0.00891212
1404	CYB5A	0.00889279
1405	FARP1	0.00888948
1406	PKP4	0.00888063
1407	GDI1	0.00887214
1408	NEDD9	0.00887131
1409	ETS1	0.00886295
1410	CFH	0.00885964
1411	CD47	0.00885784
1412	CLDN7	0.00884898
1413	MAGT1	0.00884502
1414	SMARCC2	0.00883742
1415	SEMA4B	0.00883283
1416	PSMD3	0.0088281
1417	DPYSL2	0.00881826
1418	C6orf89	0.00880672
1419	PHC2	0.00880299
1420	GPBP1L1	0.00880117
1421	POR	0.00879937
1422	LRIG1	0.00879208
1423	MFGE8	0.00879071
1424	LMO7	0.00877753
1425	CAND1	0.00876428
1426	PAK2	0.00876313
1427	NDUFV1	0.00874194
1428	ANP32B	0.00873274
1429	IFITM2	0.00873186
1430	CTSL1	0.00873093
1431	RCAN1	0.00871987
1432	ACIN1	0.00867949
1433	CDC42SE1	0.00867569
1434	GTF3C1	0.00866629
1435	MKRN1	0.00865882
1436	SPCS3	0.00864586
1437	SH3GLB1	0.0086446
1438	DDX42	0.00864394
1439	USP34	0.00862651
1440	CYC1	0.00862308
1441	COL14A1	0.00862118
1442	NFIB	0.00861661
1443	ARF5	0.00859184
1444	PLXND1	0.0085859
1445	PFKP	0.00858489
1446	CD93	0.00858016
1447	YIPF3	0.00856987
1448	TMEM43	0.00856067
1449	APEX1	0.00855597
1450	SLC6A8	0.00855244
1451	CYB561	0.00854093
1452	PSMF1	0.00852634
1453	SEPHS2	0.00850582
1454	PSMC5	0.00850104
1455	DEK	0.00848679
1456	HMGN1	0.00847012
1457	WDR26	0.0084696
1458	GABARAPL1	0.00845763
1459	CMTM6	0.0084334
1460	PDS5A	0.00841968
1461	PSMB1	0.00841644
1462	KLF5	0.00840881
1463	SUPT16H	0.00840327
1464	PPP1R12B	0.00840316
1465	DHRS7	0.0084024
1466	ZNF207	0.00839315
1467	TMED7	0.00838897
1468	ARID1A	0.00836019
1469	PRPF19	0.00835914
1470	SCAMP2	0.00835333
1471	TNFRSF21	0.00835079
1472	DHRS3	0.00833945
1473	MAVS	0.00833583
1474	DLST	0.00833079
1475	ATP6V1E1	0.00833005
1476	HNRNPR	0.00832734
1477	CD55	0.00831761
1478	BAZ2A	0.00831737
1479	POLDIP2	0.00829828
1480	CGNL1	0.00828912
1481	RCN1	0.00828457
1482	MYC	0.00828389
1483	INTS1	0.00827549
1484	ACAT1	0.00825964
1485	RER1	0.00825503
1486	C20orf30	0.0082542
1487	ATP9A	0.00825203
1488	SAP18	0.00822653
1489	43354	0.00822025
1490	PIP	0.00821491
1491	HLA-DQB1	0.00820259
1492	TOP1	0.00819038
1493	C20orf114	0.00818209
1494	CANT1	0.00817563
1495	STAG2	0.00817476
1496	SIK1	0.00817151
1497	GOLGA4	0.00816081
1498	UBR5	0.00814565
1499	PSMD4	0.00814396
1500	STMN1	0.0081399
1501	SMG1	0.00813984
1502	SPOCK2	0.00813882
1503	IRAK1	0.00812329
1504	RNF11	0.00812202
1505	PLA2G2A	0.00811749
1506	ATP6V1G1	0.00811279
1507	SULF1	0.00811167
1508	TJP1	0.00809996
1509	MUC5B	0.00809322
1510	FBL	0.00808278
1511	ATP5H	0.00808119
1512	MYO1B	0.0080791
1513	EFHD1	0.00807259
1514	COX6A1	0.00806978
1515	AGPAT3	0.00806469
1516	INSR	0.00805744
1517	PRR13	0.00804703
1518	ATP6V0B	0.0080366
1519	CLTA	0.00803488
1520	AKAP12	0.0080327
1521	RAD23A	0.00802142
1522	TRIM8	0.00801709
1523	APOH	0.00801132
1524	PFN2	0.00799145
1525	TMEM127	0.00799141
1526	GATA3	0.00798895
1527	ALDH4A1	0.00798526
1528	NRD1	0.00798507
1529	SNRNP70	0.00798076
1530	DUSP3	0.00797357
1531	ARAP1	0.00797206
1532	ATP13A3	0.00796267
1533	RBBP7	0.00795811
1534	NPLOC4	0.00795654
1535	ACTR1A	0.00795597
1536	SERPINB6	0.00795126
1537	PLXNB1	0.00794066
1538	AP1G1	0.00793104
1539	TMEM176A	0.00792602
1540	CPT1A	0.00792177
1541	MGAT4B	0.00791753
1542	LIPA	0.00791638
1543	DNAJC3	0.00791506
1544	C22orf13	0.00791344
1545	CNP	0.00791078
1546	AHR	0.00790463
1547	VAMP8	0.00790338
1548	ARPC1A	0.00789961
1549	LIMCH1	0.00789426
1550	SEMA3C	0.00787426
1551	FAM107B	0.00787001
1552	ATF3	0.00786978
1553	OAT	0.00785721
1554	TPD52L2	0.00785701
1555	KLF13	0.00785233
1556	ADD3	0.00784481
1557	FMOD	0.00784342
1558	CITED2	0.00783736
1559	CKAP4	0.00782769
1560	C1QC	0.00782747
1561	ARSD	0.00781363
1562	H6PD	0.00780239
1563	CCNG1	0.00779833
1564	CHPF	0.00779746
1565	TMEM50A	0.00779537
1566	HMGA1	0.00779175
1567	COPE	0.00779096
1568	HSBP1	0.00778738
1569	ANP32A	0.00778295
1570	NMT1	0.00776975
1571	BHMT	0.00776649
1572	CRIP2	0.00776231
1573	SNRPD2	0.00775737
1574	NAP1L4	0.00775615
1575	ANKRD17	0.00775382
1576	IL1R1	0.00774926
1577	TINAGL1	0.00773825
1578	ABP1	0.00773783
1579	SPIN1	0.00773571
1580	GLYR1	0.00773471
1581	TAF15	0.00773056
1582	IARS	0.00773024
1583	SEC14L1	0.00772165
1584	TAF7	0.0077166
1585	HEG1	0.00769562
1586	SNX17	0.00768996
1587	PACS1	0.00767805
1588	CTBP1	0.00767496
1589	KANK2	0.00765981
1590	PAICS	0.00765176
1591	OCIAD1	0.00763113
1592	GM2A	0.00762988
1593	SUN1	0.00762649
1594	ITGA5	0.00760788
1595	ADIPOR2	0.00760133
1596	LENG8	0.00759965
1597	SAR1A	0.00759682
1598	EIF3M	0.00759658
1599	EPS8L2	0.00759605
1600	ADNP	0.00759532
1601	MED13L	0.0075866
1602	TMCO1	0.00758069
1603	HNRNPH2	0.00757032
1604	DDAH1	0.00756939
1605	AUP1	0.00756452
1606	TAX1BP3	0.00756295
1607	EHF	0.00755884
1608	PPM1G	0.00753938
1609	CSNK2B	0.00753891
1610	TNPO1	0.00753077
1611	DHX15	0.00752939
1612	METTL9	0.00752618
1613	TRPS1	0.00751147
1614	CALCOCO2	0.00750824
1615	PCNP	0.00748569
1616	ATP6V1B2	0.0074839
1617	JTB	0.00747521
1618	SFRS2IP	0.00747024
1619	HEXB	0.00746726
1620	EP300	0.00744969
1621	C10orf58	0.00744295
1622	POLR2E	0.00742914
1623	NUPR1	0.0074212
1624	PHLDA1	0.00742045
1625	CASC3	0.0074175
1626	SPATS2L	0.00740722
1627	LBH	0.00739922
1628	SFRS11	0.00739337
1629	LRBA	0.00738407
1630	AK2	0.00737711
1631	SMG5	0.00737502
1632	SMC1A	0.00735569
1633	SERINC3	0.00732971
1634	TRA2B	0.0073297
1635	CELSR1	0.00732636
1636	NES	0.0073229
1637	RNPS1	0.00732084
1638	EIF3G	0.00731919
1639	HSPA1B	0.00731408
1640	CD99	0.00731379
1641	AAMP	0.00730233
1642	AKR1B1	0.00729355
1643	ORMDL3	0.00729266
1644	SORD	0.0072771
1645	EIF3F	0.00727003
1646	SEC63	0.00726834
1647	EI24	0.00726688
1648	C20orf108	0.00725634
1649	PTP4A2	0.00725105
1650	PARP14	0.00725039
1651	FSCN1	0.00724912
1652	CORO1B	0.00724617
1653	HSPB6	0.00724497
1654	MLPH	0.00724183
1655	FAM129A	0.00723649
1656	NHP2L1	0.00722588
1657	CREBBP	0.00722071
1658	NID1	0.00720341
1659	TENC1	0.00719529
1660	DCTN2	0.00719123
1661	SLC7A5	0.00718468
1662	ZNF395	0.00718202
1663	MRC2	0.00717188
1664	NDUFS2	0.00716646
1665	GPAA1	0.00716482
1666	SLC12A2	0.0071631
1667	SSU72	0.00715112
1668	PNPLA2	0.0071494
1669	HLA-H	0.00714825
1670	YPEL5	0.00713306
1671	PPAP2A	0.00713263
1672	TNFAIP2	0.00712961
1673	GIPC1	0.00712828
1674	CAB39	0.00711907
1675	ATXN2L	0.00711583
1676	CIB1	0.00711522
1677	RAB11B	0.0071109
1678	SDHC	0.00710789
1679	PEPD	0.00710786
1680	SUCLG1	0.00710727
1681	KLF10	0.00709836
1682	FBXO7	0.00708647
1683	NUP98	0.00708619
1684	HSPA4	0.00707655
1685	FADS2	0.00707505
1686	DAD1	0.00707204
1687	NCOR1	0.00706649
1688	LARS	0.00706627
1689	CHTF8	0.00706577
1690	PKN1	0.00706489
1691	TM9SF4	0.00706293
1692	SLC12A3	0.00705818
1693	LAP3	0.00705398
1694	KIAA0664	0.00704043
1695	PTK2	0.00703031
1696	CCPG1	0.00702778
1697	KIAA0319L	0.00702614
1698	AKR1C2	0.00702534
1699	API5	0.00701993
1700	IVD	0.00701505
1701	TEX261	0.00701496
1702	GGA2	0.00701175
1703	TMED3	0.00700344
1704	HEXA	0.00700136
1705	DCAF8	0.00698944
1706	ZMYND11	0.00698576
1707	UGT2B7	0.00698554
1708	KDM5C	0.00698096
1709	HSPH1	0.00697372
1710	MIDN	0.00696962
1711	IFNGR1	0.00696169
1712	ARL1	0.00696158
1713	PXDN	0.00696054
1714	RNF40	0.0069594
1715	PPP1R15A	0.00695861
1716	ALKBH5	0.00695518
1717	DNAJC5	0.0069517
1718	SNX5	0.00695095
1719	TMEM87A	0.00694941
1720	SPAG9	0.00694634
1721	LTBR	0.00694472
1722	KDM3B	0.00694189
1723	LAD1	0.00693852
1724	PTGFRN	0.00693783
1725	RALBP1	0.00692371
1726	CMBL	0.00692132
1727	AGT	0.00692027
1728	TMEM49	0.00690967
1729	B4GALT5	0.00689361
1730	PLP2	0.00689026
1731	AKR1C3	0.00689004
1732	AIM1	0.00688798
1733	PUM1	0.00688731
1734	MAP4K4	0.00688671
1735	HGSNAT	0.00688016
1736	CLIC5	0.00687342
1737	TMEM214	0.00687119
1738	ACOX1	0.00686254
1739	LMOD1	0.00685784
1740	CSE1L	0.00685657
1741	SMARCD2	0.00685471
1742	ATP11A	0.00685064
1743	SETD7	0.0068416
1744	KCNJ16	0.00683616
1745	NPEPPS	0.00683326
1746	C21orf33	0.00682412
1747	PLTP	0.00682287
1748	VAMP3	0.00682135
1749	LTA4H	0.00681111
1750	KIAA0247	0.00680046
1751	HBA2	0.00679209
1752	GALNT2	0.00679166
1753	FAM102A	0.00679118
1754	WDR45L	0.00679066
1755	DVL3	0.00679051
1756	PINK1	0.00678267
1757	DNAJC10	0.0067826
1758	ICMT	0.00677814
1759	MATN2	0.00677095
1760	RHBDD2	0.00676647
1761	ACTA1	0.00676421
1762	RXRA	0.0067615
1763	PAX8	0.00676024
1764	POM121	0.00675938
1765	COMT	0.00675059
1766	STRAP	0.00674851
1767	C16orf58	0.00674782
1768	ITFG3	0.00674703
1769	SLC4A2	0.00673631
1770	LDLR	0.00673543
1771	S100A4	0.00672849
1772	FAM198B	0.00672652
1773	KIAA1671	0.00672226
1774	MLL2	0.00671918
1775	PVRL1	0.00671778
1776	ZMIZ2	0.00671346
1777	ATP6V0D1	0.006709
1778	TOB1	0.00670686
1779	MAN2B1	0.006706
1780	CLINT1	0.00670214
1781	DDX23	0.00668991
1782	SRP72	0.00667848
1783	TMEM9	0.00667792
1784	NKX3-1	0.00667641
1785	MAF1	0.00667424
1786	SYNE1	0.00666737
1787	LRP5	0.00666477
1788	PTK7	0.00666141
1789	TBC1D14	0.00666078
1790	SLC25A23	0.00665975
1791	NEU1	0.00665911
1792	IFI16	0.00665403
1793	TTYH3	0.00665141
1794	HIGD1A	0.0066487
1795	ARL8B	0.00664587
1796	C8orf4	0.00663715
1797	OST4	0.00663671
1798	PNRC2	0.00663613
1799	PABPN1	0.00663224
1800	SDC3	0.00663176
1801	FAM83H	0.0066272
1802	TJP2	0.00662486
1803	FBP1	0.0066198
1804	TPO	0.00661966
1805	EFNA1	0.00661707
1806	FLNC	0.00661422
1807	TP53I11	0.00661131
1808	GALNT1	0.00661064
1809	ANKRD11	0.00660972
1810	PER1	0.00660667
1811	ANAPC16	0.00660357
1812	NUFIP2	0.00660055
1813	APEH	0.00659882
1814	PSME3	0.00659745
1815	RHCG	0.00658985
1816	HLA-DRB5	0.00658899
1817	CAV2	0.00658825
1818	NOLC1	0.00658773
1819	SLC39A9	0.00657822
1820	GORASP2	0.00655923
1821	HNRNPH3	0.00655621
1822	ARL6IP4	0.00654316
1823	ANAPC5	0.0065395
1824	PEX19	0.00653534
1825	SH3BP4	0.00653264
1826	CDK4	0.00652756
1827	SLC13A3	0.00652521
1828	FOXA1	0.0065042
1829	SLC4A4	0.00650221
1830	FNDC3B	0.00649417
1831	KLF9	0.00649141
1832	SGPL1	0.00648987
1833	PITPNA	0.00648327
1834	MALL	0.0064822
1835	ADRBK1	0.00648058
1836	C2orf28	0.00647561
1837	DDX1	0.00647539
1838	ARID5B	0.00647481
1839	ABL1	0.00647393
1840	SLC39A14	0.00647304
1841	RBL2	0.0064709
1842	OSBP	0.00646649
1843	CUTA	0.00644908
1844	RANGAP1	0.00644759
1845	MINK1	0.00644559
1846	NDUFS5	0.00644469
1847	CSN2	0.00643554
1848	ZFP106	0.00643249
1849	BANF1	0.00643183
1850	CHD2	0.00640789
1851	MIA3	0.00640439
1852	DCAF11	0.00640066
1853	SMS	0.00640043
1854	LIFR	0.00639761
1855	ERLIN2	0.00639596
1856	STEAP4	0.00639078
1857	CUBN	0.00638674
1858	FGFR1	0.00638129
1859	ARHGAP5	0.00636975
1860	C7orf41	0.00636944
1861	SBDS	0.00636702
1862	FDPS	0.006366
1863	DBNL	0.0063605
1864	MTUS1	0.00635681
1865	EPB41L1	0.00634918
1866	PLAU	0.00634876
1867	SEC11A	0.00634212
1868	G3BP1	0.00634017
1869	SUMO3	0.00633193
1870	SHROOM3	0.00632067
1871	CHMP2A	0.00631921
1872	FBLN2	0.00631561
1873	FXR1	0.00631459
1874	CBR1	0.00631057
1875	PCDHGC3	0.00630212
1876	PNRC1	0.00629827
1877	CHMP1A	0.0062939
1878	FBXW5	0.00629351
1879	SDHD	0.00628397
1880	FZD4	0.00628301
1881	TSPO	0.00628055
1882	NUDCD3	0.00627652
1883	UCP2	0.00626832
1884	ESR1	0.00626277
1885	KIDINS220	0.00625533
1886	LAMA3	0.00625144
1887	WLS	0.0062478
1888	SLC35A4	0.00623315
1889	C11orf2	0.0062329
1890	BIRC6	0.00622675
1891	OPTN	0.00622453
1892	ANO1	0.00621914
1893	MAOB	0.00621803
1894	AHNAK2	0.00621349
1895	CLIP1	0.00621212
1896	NRBP1	0.00621023
1897	KIF13B	0.00620963
1898	SELT	0.0062094
1899	APOC3	0.00620887
1900	SLC12A7	0.00620822
1901	GBP2	0.00620817
1902	GPC1	0.00618959
1903	AMOTL2	0.006175
1904	BST2	0.00617136
1905	IER3	0.0061694
1906	INF2	0.00615441
1907	PROM2	0.0061541
1908	VCAM1	0.00614569
1909	EPHB4	0.00614236
1910	PARP4	0.00613773
1911	DERL1	0.00612501
1912	TRPC4AP	0.00612234
1913	UBA2	0.00612221
1914	DYNLRB1	0.00612127
1915	BAZ1B	0.00611738
1916	TRIM2	0.00611685
1917	SMG7	0.00610668
1918	FLT1	0.00610437
1919	MAP7D1	0.00610396
1920	GBF1	0.00610234
1921	HLA-DQA1	0.0060971
1922	KIF3B	0.00609024
1923	NEBL	0.00608486
1924	ZFR	0.00608177
1925	COX5B	0.00608154
1926	OXA1L	0.00607551
1927	MUCL1	0.00607148
1928	MAL	0.00607145
1929	C19orf6	0.00606888
1930	43165	0.00606403
1931	PSMC3	0.00605778
1932	IL6ST	0.00605238
1933	SMARCA5	0.00605099
1934	PSMD13	0.00605057
1935	ACY1	0.00604967
1936	RAP1B	0.00604674
1937	ABR	0.00604167
1938	SPEN	0.00603711
1939	GLT25D1	0.00603503
1940	ST3GAL1	0.00603271
1941	VWA1	0.00603132
1942	RBM4	0.0060294
1943	GDE1	0.00602933
1944	MPRIP	0.00602621
1945	DSC2	0.00602507
1946	AKAP1	0.00602028
1947	ASH1L	0.00602012
1948	C1orf116	0.00601732
1949	ATRN	0.00601492
1950	SFRS9	0.00600317
1951	VPS13D	0.00599804
1952	MCM7	0.00599761
1953	AQP8	0.00599572
1954	TFG	0.00599471
1955	DLD	0.00599028
1956	PPP2CB	0.00598762
1957	TM7SF3	0.00597997
1958	RAF1	0.00597991
1959	IMMT	0.0059794
1960	POLDIP3	0.00597777
1961	TAB2	0.0059747
1962	UFC1	0.00596951
1963	HNRNPA1L2	0.00596355
1964	NUDT21	0.00596255
1965	CPNE1	0.00596085
1966	KCNJ1	0.00595872
1967	KRT20	0.00595479
1968	EGF	0.00595341
1969	ZNF638	0.00595034
1970	CD34	0.0059454
1971	TCEAL4	0.00594178
1972	C2orf24	0.00593909
1973	CKAP5	0.0059389
1974	GSTM3	0.0059341
1975	CHRDL1	0.00593388
1976	ARHGAP29	0.00593203
1977	PLOD2	0.00593184
1978	CDK2AP1	0.00592804
1979	RARRES2	0.00592658
1980	NEO1	0.00592212
1981	GPAM	0.00592083
1982	LCN2	0.00591543
1983	VASP	0.00591537
1984	CRNN	0.00591183
1985	ZBTB38	0.00591045
1986	MX1	0.00589717
1987	SAPS3	0.00589234
1988	SHMT1	0.00589143
1989	RAPGEF1	0.00588635
1990	DNAJB2	0.00588499
1991	QKI	0.00587653
1992	AMACR	0.00587272
1993	ATF6B	0.00586938
1994	PSMA6	0.00586545
1995	XRN2	0.00586531
1996	SETX	0.00585984
1997	ZNF24	0.00584887
1998	ACSL4	0.00584077
[truncated: 18,504 more rows]
