# Supplementary material for: Wx: a neural network-based feature selection algorithm for transcriptomic data
Source: Sci Rep. 2019 Jul 19;9:10500. doi: 10.1038/s41598-019-47016-8 (PMC6642261; doi:10.1038/s41598-019-47016-8)
Supplement: Supplementary file 3 — Table S2 [file 41598_2019_47016_MOESM3_ESM.xlsx]

## Sheet: Table S2
Supplementary Table 2. Classification accuracy (%)
Cancer subtype	Classifier	14 UGCBs
		Wx	Peng's	edgeR
BLCA	XGBoost	95.79	97.2	94.86
	SVM	95.33	95.33	95.33
BRCA	XGBoost	97.86	96.38	91.78
	SVM	97.2	93.91	90.63
COAD	XGBoost	94.51	87.2	98.78
	SVM	86.59	87.2	98.17
HNSC	XGBoost	97.17	92.23	94.35
	SVM	92.58	92.23	92.23
KICH	XGBoost	95.65	-	100
	SVM	95.65	-	95.65
KIRC	XGBoost	99.67	-	99.34
	SVM	98.68	-	93.73
KIRP	XGBoost	99.38	-	99.38
	SVM	98.77	-	97.53
LIHC	XGBoost	90.57	94.81	87.74
	SVM	88.21	88.68	88.21
LUAD	XGBoost	97.92	97.58	98.96
	SVM	96.19	90.66	89.62
LUSC	XGBoost	98.19	96.75	99.28
	SVM	98.92	94.95	90.61
PRAD	XGBoost	93.45	-	92.36
	SVM	90.55	-	93.45
THCA	XGBoost	95.8	-	90.21
	SVM	94.06	-	89.51
