# Supplementary material for: Wx: a neural network-based feature selection algorithm for transcriptomic data
Source: Sci Rep. 2019 Jul 19;9:10500. doi: 10.1038/s41598-019-47016-8 (PMC6642261; doi:10.1038/s41598-019-47016-8)
Supplement: Supplementary file 4 — Table S3 [file 41598_2019_47016_MOESM4_ESM.xlsx]

## Sheet: Table S3
Supplementary Table 3. Classification accuracy (%)
Number of top features (genes) identified by WX	Classifier	Liver (GSE105127)
		Pericentral (n=19)	Intermediate (n=19)	Periportal (n=19)
10	XGBoost	57.89	50	50
	SVM	68.42	72.22	0
20	XGBoost	78.95	66.67	50
	SVM	73.68	44.44	0
30	XGBoost	84.21	72.22	62.5
	SVM	73.68	27.78	6.25
50	XGBoost	84.21	66.67	50
	SVM	78.95	33.33	0
100	XGBoost	84.21	61.11	62.5
	SVM	84.21	55.56	0
200	XGBoost	84.21	77.78	81.25
	SVM	84.21	61.11	0
