# Supplementary material for: Wx: a neural network-based feature selection algorithm for transcriptomic data
Source: Sci Rep. 2019 Jul 19;9:10500. doi: 10.1038/s41598-019-47016-8 (PMC6642261; doi:10.1038/s41598-019-47016-8)
Supplement: Supplementary file 5 — Table S4 [file 41598_2019_47016_MOESM5_ESM.xlsx]

## Sheet: Table S4
Supplementary Table 4. Time to completion of feature selection using the Wx algorithm (runtime).
Number of classes	Parameters (single layer perceptron)					Result
	Hardware	epochs	batch size	Number of features	Number of samples (10% development set)	Elapsed time (second)
2	CPU (Intel i7 4790K)	30	128	20502	5000	11.4853
2					4000	9.2349
2					3000	7.1461
2					2000	4.9264
2					1000	2.905
2	GPU (NVIDIA TITAN X)	30	128	20502	5000	15.3709
2					4000	13.268
2					3000	10.2749
2					2000	7.4867
2					1000	4.7439
